# Supplementary material for: Human Granulocyte Macrophage Colony-Stimulating Factor Enhances Antibiotic Susceptibility of Pseudomonas aeruginosa Persister Cells
Source: PubMed Central journal article supplement (PMC4663479; doi:10.1038/srep17315), 2015-11-30
Supplement: srep17315-s1.pdf [file srep17315-s1.pdf]

## Supplementary Information

### **Human Granulocyte Macrophage Colony-Stimulating Factor Enhances Antibiotic Susceptibility of *Pseudomonas aeruginosa* Persister Cells**

Geetika S. Choudhary<sup>1,2</sup>, Xiangyu Yao<sup>1,2</sup>, Jing Wang<sup>1,2</sup>, Bo Peng<sup>1,2</sup>, Rebecca A. Bader<sup>1,2</sup>, and  
Dacheng Ren<sup>1,2,3,4,\*</sup>

<sup>1</sup>Department of Biomedical and Chemical Engineering, Syracuse University, Syracuse, NY 13244, USA.

<sup>2</sup>Syracuse Biomaterials Institute, Syracuse University, Syracuse, NY 13244, USA.

<sup>3</sup>Department of Civil and Environmental Engineering, Syracuse University, Syracuse, NY 13244, USA.

<sup>4</sup>Department of Biology, Syracuse University, Syracuse, NY 13244, USA.

\*Corresponding author. Email: dren@syr.edu

## Supplementary Figures

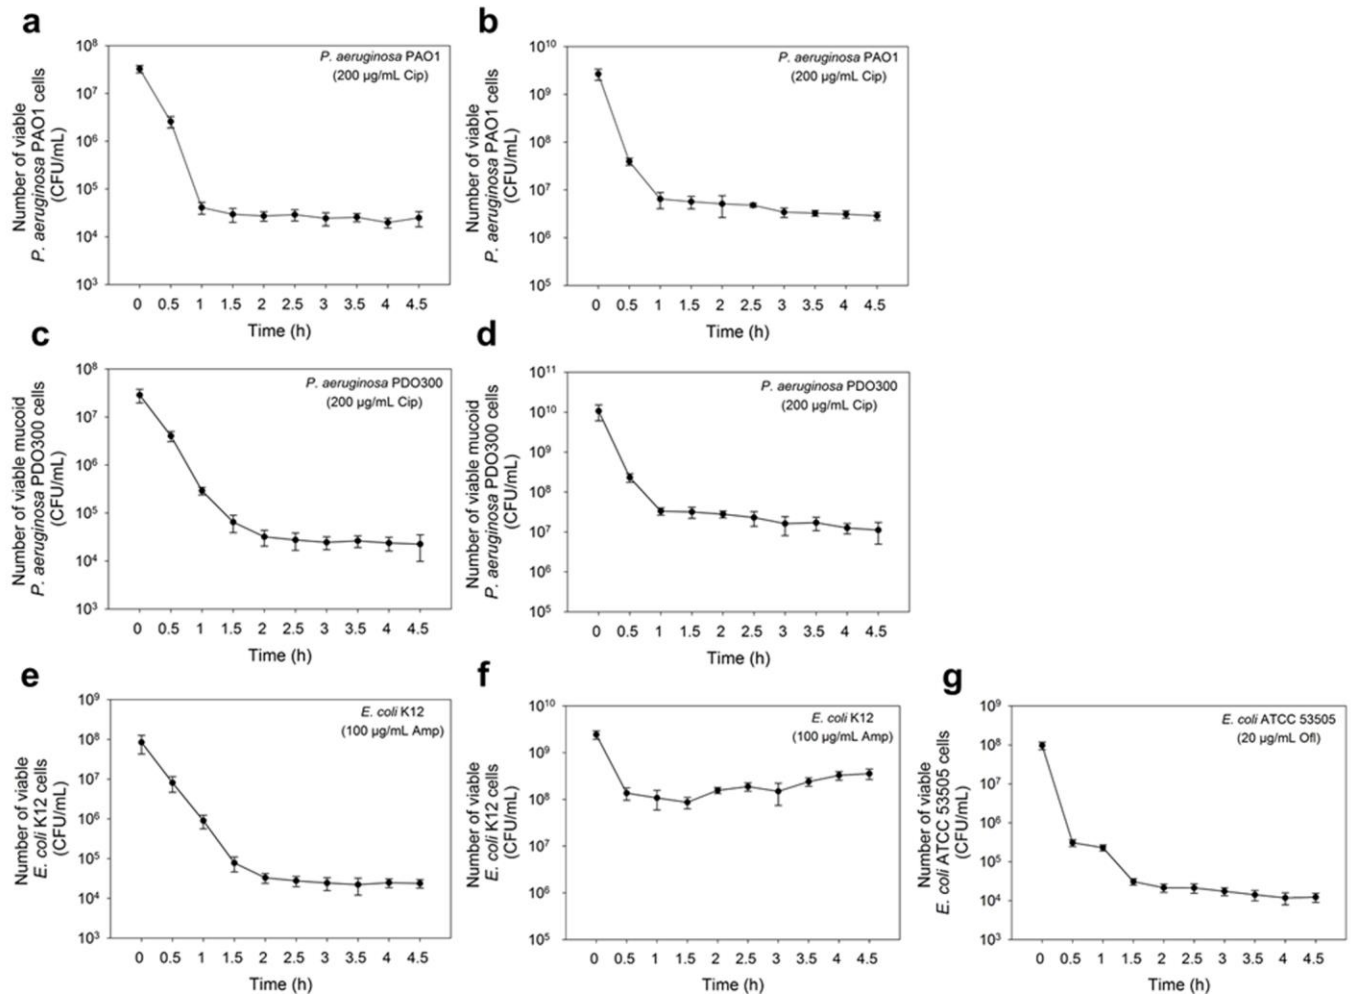

**Supplementary Figure S1. Biphasic killing curves of *P. aeruginosa* PAO1, PDO300, *E. coli* K12, and *E. coli* ATCC53505 cells collected from exponential and stationary phase cultures.** *P. aeruginosa* PAO1 cells collected from exponential (a) and stationary (b) phase cultures were treated with 200 µg/mL ciprofloxacin (Cip). *P. aeruginosa* PDO300 cells collected from exponential (c) and stationary (d) phase cultures were treated with 200 µg/mL ciprofloxacin (Cip). *E. coli* K12 cells collected from exponential (e) and stationary (f) phase cultures were treated with 100 µg/mL ampicillin (Amp). *E. coli* ATCC 53505 cells collected from exponential phase cultures (g) were treated with 20 µg/mL ofloxacin (OfI). The samples were tested in triplicate (n=3). Error bars represent SD.

## Supplementary Tables

**Supplementary Table S1. MIC of ciprofloxacin, tobramycin, tetracycline, and gentamicin for strains *P. aeruginosa* PAO1, *P. aeruginosa* PDO300, and *E. coli* K12.**

| <b>Bacterial strain</b>     | <b>Antibiotic MIC</b> |            |              |            |
|-----------------------------|-----------------------|------------|--------------|------------|
|                             | Ciprofloxacin         | Tobramycin | Tetracycline | Gentamicin |
| <i>P. aeruginosa</i> PAO1   | 3.2 µg/mL             | 0.8 µg/mL  | 12.8 µg/mL   | 6.4 µg/mL  |
| <i>P. aeruginosa</i> PDO300 | 6.4 µg/mL             | 3.2 µg/mL  | 25.6 µg/mL   | 6.4 µg/mL  |
| <i>E. coli</i> K12          | 0.4 µg/mL             | 0.4 µg/mL  | 0.8 µg/mL    | 3.2 µg/mL  |

**Supplementary Table S2. Comparison of qPCR results with the DNA microarray results for 10 representative genes in *P. aeruginosa* PAO1 persister cells.**

| Gene        | Expression fold change (GM-CSF vs. Control) |                       |
|-------------|---------------------------------------------|-----------------------|
|             | DNA microarray                              | qPCR                  |
| <i>flgF</i> | +2.3                                        | +3.3                  |
| <i>fliN</i> | +2.3                                        | +8.5                  |
| <i>prtN</i> | +2.8                                        | +3.3                  |
| PA0620      | +2.7                                        | +5.2                  |
| PA0633      | +3.1                                        | +6.5                  |
| PA0640      | +3.1                                        | +4.7                  |
| <i>recA</i> | +2.2                                        | No significant change |
| <i>wbpK</i> | -5.0                                        | -2.1                  |
| <i>algA</i> | -2.5                                        | -5.9                  |
| <i>argH</i> | No significant change                       | No significant change |

**Supplementary Table S3. Comparison of qPCR results with the DNA microarray results for 4 representative genes in *P. aeruginosa* PAO1 normal cells.**

| <b>Gene</b> | <b>Expression fold change (GM-CSF vs. Control)</b> |       |
|-------------|----------------------------------------------------|-------|
|             | DNA microarray                                     | qPCR  |
| <i>dnaB</i> | +8.2                                               | +3.0  |
| <i>yrfI</i> | +4.7                                               | +4.3  |
| PA5548      | -5.5                                               | -1.7  |
| PA0364      | -11.8                                              | -35.5 |

**Supplementary Table S4. Primers used for qPCR tests on PAO1 persister cells.**

| <b>Primer</b>       | <b>Sequence</b>       | <b>Product size (bp)</b> |
|---------------------|-----------------------|--------------------------|
| <i>rpoD</i> Forward | CGGTCAACCTGAAGGACGAT  | 253                      |
| <i>rpoD</i> Reverse | ACCAGCTTGATCGGCATGAA  |                          |
| <i>flgF</i> Forward | TCAACCCGAACCTGAAGCAG  | 273                      |
| <i>flgF</i> Reverse | CACCACGCTCAAGTGATTAGC |                          |
| <i>fliN</i> Forward | GGATGTGATCCTGGACATCCC | 245                      |
| <i>fliN</i> Reverse | GCAGCTTCTTGATGCGTTTCG |                          |
| <i>priN</i> Forward | ACCGTGGAATTGGTCTACCG  | 271                      |
| <i>priN</i> Reverse | CTCAGGATGCGATGCTGTCA  |                          |
| PA0620 Forward      | TGCTGTCTCGAACAGTAGCG  | 268                      |
| PA0620 Reverse      | AGGAACCTCCAATGTCGCAG  |                          |
| PA0633 Forward      | CAGATCTACGCCCTGGTTCC  | 253                      |
| PA0633 Reverse      | TCGTCTCGCCATCTTTCTCG  |                          |
| PA0640 Forward      | CGACATATTCAAGCGAGCCG  | 240                      |
| PA0640 Reverse      | AGGTCAGCCCTTTTCGATTCC |                          |
| <i>recA</i> Forward | TCCGAACATTCTTCCCGTCG  | 258                      |
| <i>recA</i> Reverse | CGATGTCCAGACCCAGGGAG  |                          |
| <i>wbpK</i> Forward | ACAGGTCGATGCTTCCAAGG  | 243                      |
| <i>wbpK</i> Reverse | CCCCAGGTAGCGACAAATGA  |                          |
| <i>algA</i> Forward | GTCGTCGATCTGGGACGTG   | 263                      |
| <i>algA</i> Reverse | GGTAGACCTCGCAGTGGTTC  |                          |
| <i>argH</i> Forward | CAGGAAGACAAGGAACCGCT  | 231                      |
| <i>argH</i> Reverse | GCTGTCTACGCCGTACTTCA  |                          |

**Supplementary Table S5. Primers used for qPCR tests on PAO1 normal cells.**

| <b>Primer</b>       | <b>Sequence</b>       | <b>Product size (bp)</b> |
|---------------------|-----------------------|--------------------------|
| <i>dnaB</i> Forward | CGACGTGGAAACCACTCTGA  | 347                      |
| <i>dnaB</i> Reverse | CGATGGTCATGGCGGTAGAA  |                          |
| <i>yrfI</i> Forward | CCCGCATGTCCCATTTCAGAT | 303                      |
| <i>yrfI</i> Reverse | CGATGGACTCCGCCGAATAG  |                          |
| PA5548 Forward      | TATTCTTCGTCGGCGTGACC  | 300                      |
| PA5548 Reverse      | TGGTCGGGATGATGATTGCC  |                          |
| PA0364 Forward      | AGCTCTCGGTCTACGGTCTT  | 303                      |
| PA0364 Reverse      | GAAAAGCCGTGAAGCACGTT  |                          |
